# Supplementary material for: Advocacy counterstrategies to tobacco industry interference in policymaking: a scoping review of peer-reviewed literature
Source: PubMed Central journal article supplement (PMC10286487; doi:10.1186/s12992-023-00936-7), 2023-06-21
Supplement: 12992_2023_936_MOESM1_ESM.pdf [file 12992_2023_936_MOESM1_ESM.pdf]

## Additional File 1: Articles included in the scoping review (in chronological order)

| Author(s)                            | Year | Title                                                                                                                                  | Data sources (according to the authors or, if not available, our reading)                                                                             | Geographical focus of paper (and of example(s) if different) and income group |
|--------------------------------------|------|----------------------------------------------------------------------------------------------------------------------------------------|-------------------------------------------------------------------------------------------------------------------------------------------------------|-------------------------------------------------------------------------------|
| <b>Macdonald HR/<br/>Glantz SA</b>   | 1997 | Political Realities of State-wide Smoking Legislation: The Passage of California's Assembly Bill 13                                    | Interviews, data from legislative hearings and debates, public documents, letters and personal communication, internal memoranda, newspaper articles. | California, USA<br>High-income country (HIC)                                  |
| <b>Goldman LK/<br/>Glantz SA</b>     | 1999 | The passage and initial implementation of Oregon's Measure 44                                                                          | Interviews, public records, internal memoranda, newspaper articles                                                                                    | Oregon, USA<br>HIC                                                            |
| <b>Sato H</b>                        | 1999 | Policy and politics of smoking control in Japan                                                                                        | Government documents, Japan Monopoly Public Corporation documents                                                                                     | Japan (Canada)<br>HIC                                                         |
| <b>Givel MS/ Glantz SA</b>           | 2000 | Tobacco Control and Direct Democracy in Dade County, Florida: Future Implications for Health Advocates                                 | Internal industry documents, public records, newspaper articles, documents from health organisations, interviews                                      | Florida, USA<br>HIC                                                           |
| <b>Bero L et al.</b>                 | 2001 | Science in Regulatory Policy Making: Case Studies in the Development of Workplace Smoking Restrictions                                 | Written public commentaries and hearing transcripts, including substantive letters, reports and the first copies of duplicate letters                 | Maryland and Washington, USA<br>HIC                                           |
| <b>Chantornvong S/<br/>McCargo D</b> | 2001 | Political Economy of Tobacco Control in Thailand                                                                                       | Interviews, reports, newspaper articles                                                                                                               | Thailand<br>Lower-middle income country (LMIC)                                |
| <b>Magzamen S/<br/>Glantz SA</b>     | 2001 | The new battleground: California's experience with smoke-free bars                                                                     | Interviews, newspaper articles, internal industry memoranda, personal correspondence, public documents, legislative meetings                          | California, USA<br>HIC                                                        |
| <b>Hiilamo H</b>                     | 2003 | Tobacco industry strategy to undermine tobacco control in Finland                                                                      | Internal industry documents                                                                                                                           | Finland<br>HIC                                                                |
| <b>Tsoukalas T/<br/>Glantz SA</b>    | 2003 | The Duluth Clean Indoor Air Ordinance: Problems and Success in Fighting the Tobacco Industry at the Local Level in the 21st Century    | Interviews, newspaper articles, internal industry documents, reports (government and third sector), academic literature                               | Duluth, Minnesota (USA)<br>HIC                                                |
| <b>Bailey C</b>                      | 2004 | From "Informed Choice" to "Social Hygiene": Government Control of Cigarette Smoking in the US                                          | Policy documents, including government reports and speeches, newspaper articles, other grey literature, academic literature                           | USA<br>HIC                                                                    |
| <b>O'Dougherty M et al.</b>          | 2010 | Communicating With Local Elected Officials: Lessons Learned From Clean Indoor Air Ordinance Campaigns                                  | Interviews                                                                                                                                            | USA<br>HIC                                                                    |
| <b>Crosbie E et al.</b>              | 2011 | Strong advocacy led to successful implementation of smokefree Mexico City                                                              | Policy documents, newspaper articles. Interviews                                                                                                      | Mexico City<br>Upper-middle income country (UMIC)                             |
| <b>Tumwine J</b>                     | 2011 | Implementation of the Framework Convention on Tobacco Control in Africa: Current status of legislation                                 | WHO data. legal documents, supplementary: academic articles, internal industry documents, newspaper articles                                          | Several African countries (Niger)<br>Low-income country (LIC) (Niger)         |
| <b>Charoenc N et al.</b>             | 2012 | Success counteracting tobacco company interference in Thailand: An example of FCTC implementation for low- and middle-income countries | Documents (including historical records advocates collected, internal industry documents and annual                                                   | Thailand<br>UMIC                                                              |

|                                  |           |                                                                                                                                                                          |                                                                                                                                                                 |                                                       |
|----------------------------------|-----------|--------------------------------------------------------------------------------------------------------------------------------------------------------------------------|-----------------------------------------------------------------------------------------------------------------------------------------------------------------|-------------------------------------------------------|
|                                  |           |                                                                                                                                                                          | reports), company websites, interviews                                                                                                                          |                                                       |
| <b>Lane C/ Carter M</b>          | 2012      | The role of evidence-based media advocacy in the promotion of tobacco control policies                                                                                   | Reports, internal records                                                                                                                                       | Mexico<br>UMIC                                        |
| <b>Crosbie E et al.</b>          | 2016      | Costa Rica's implementation of the Framework Convention on Tobacco Control: Overcoming decades of industry dominance                                                     | Policy documents, newspaper articles, interviews                                                                                                                | Costa Rica<br>UMIC                                    |
| <b>Crosbie E et al.</b>          | 2017      | The importance of continued engagement during the implementation phase of tobacco control policies in a middle-income country: the case of Costa Rica                    | Policy documents, newspaper articles, interviews                                                                                                                | Costa Rica<br>UMIC                                    |
| <b>Crosbie E et al.</b>          | 2018      | Defending strong tobacco packaging and labelling regulations in Uruguay: transnational tobacco control network versus Philip Morris International                        | Policy documents, newspaper articles, interviews                                                                                                                | Uruguay<br>HIC                                        |
| <b>Nakkash RT et al.</b>         | 2018      | The passage of tobacco control law 174 in Lebanon: reflections on the problem, policies and politics                                                                     | Historical records of government decisions, documentation of advocacy campaign, interviews                                                                      | Lebanon<br>UMIC                                       |
| <b>Uang R et al.</b>             | 2018      | Tobacco control law implementation in a middle-income country: Transnational tobacco control network overcoming tobacco industry opposition in Colombia                  | Newspaper articles, policy and legal documents, NGO reports, interviews                                                                                         | Colombia<br>UMIC                                      |
| <b>Egbe CO et al.</b>            | 2019      | Role of stakeholders in Nigeria's tobacco control journey after the FCTC: lessons for tobacco control advocacy in low-income and middle-income countries                 | Interviews, newspaper articles, copies of public hearing proceedings                                                                                            | Nigeria<br>LMIC                                       |
| <b>Bhatta DN et al.</b>          | 2020<br>a | Exceeding WHO Framework Convention on Tobacco Control (FCTC) Obligations: Nepal Overcoming Tobacco Industry Interference to Enact a Comprehensive Tobacco Control Policy | Newspaper articles, policy documents, interviews                                                                                                                | Nepal<br>LMIC                                         |
| <b>Bhatta DN et al.</b>          | 2020<br>b | Defending comprehensive tobacco control policy implementation in Nepal from tobacco industry interference (2011–2018)                                                    | Newspaper articles, policy documents, interviews                                                                                                                | Nepal<br>LMIC                                         |
| <b>Bhatta DN et al.</b>          | 2020<br>c | Tobacco control in Nepal during a time of government turmoil (1960–2006)                                                                                                 | Tobacco industry documents, newspaper articles, interviews                                                                                                      | Nepal<br>LMIC                                         |
| <b>Crosbie E/ Schmidt LA</b>     | 2020      | Preemption in Tobacco Control: A Framework for Other Areas of Public Health                                                                                              | State reports, academic literature                                                                                                                              | USA<br>HIC                                            |
| <b>Matthes BK et al.</b>         | 2020      | Needs of LMIC-based tobacco control advocates to counter tobacco industry policy interference: Insights from semi-structured interviews                                  | Interviews                                                                                                                                                      | Eight LMICs<br>(not specified)                        |
| <b>Patanavanich R/ Glantz SA</b> | 2020      | Successful countering of tobacco industry efforts to overturn Thailand's ENDS ban                                                                                        | Newspaper articles, reports, information from websites and social media platforms of relevant groups, meeting minutes, letters submitted to government agencies | Thailand<br>UMIC                                      |
| <b>Bosma LM et a.</b>            | 2021      | Restricting Sales of Menthol Tobacco Products: Lessons Learned from Policy Passage and Implementation in Minneapolis, St. Paul, and Duluth, Minnesota                    | Interviews                                                                                                                                                      | Minneapolis, St. Paul, Duluth, Minnesota (USA)<br>HIC |
| <b>Hoe C et al.</b>              | 2021      | The battle to increase tobacco taxes: Lessons from Philippines and Ukraine                                                                                               | Interview, documents                                                                                                                                            | Philippines<br>Ukraine<br>LMIC (both)                 |
| <b>Kusi-Ampofo, O</b>            | 2021      | Negotiating Change: Ideas, Institutions, and Political Actors in Tobacco Control Policy Making in Mauritius                                                              | Government documents, media reports, archival studies, grey literature, published books and articles, interviews                                                | Mauritius<br>UMIC                                     |

Income group: based on World Bank data and year of publication (accessed on 16/03/2022 through <https://datatopics.worldbank.org/world-development-indicators/the-world-by-income-and-region.html>)
