# Supplementary material for: Advocacy counterstrategies to tobacco industry interference in policymaking: a scoping review of peer-reviewed literature
Source: PubMed Central journal article supplement (PMC10286487; doi:10.1186/s12992-023-00936-7), 2023-06-21
Supplement: 12992_2023_936_MOESM2_ESM.pdf [file 12992_2023_936_MOESM2_ESM.pdf]

## Additional File 2: PDM action-based strategies and counterstrategies - References per cell for Table 3

| <b>PDM instrumental strategies / counter strategies</b> | <b>Exposing industry conduct and false claims</b>                                                                                                                                                                         | <b>Accessing decisionmakers</b>                                                                                                                                          | <b>Generating and using evidence</b>                                                                                      | <b>Filing a complaint/ taking legal action</b>                       | <b>Mobilising coalition and potential supporters</b>                              |
|---------------------------------------------------------|---------------------------------------------------------------------------------------------------------------------------------------------------------------------------------------------------------------------------|--------------------------------------------------------------------------------------------------------------------------------------------------------------------------|---------------------------------------------------------------------------------------------------------------------------|----------------------------------------------------------------------|-----------------------------------------------------------------------------------|
| <b>Direct Access and Influence</b>                      | Bhatta et al. 2020a, Crosbie et al. 2016, Crosbie et al. 2018, Egbe et al. 2019, Hoe et al. 2021, Lane/ Carter 2012, Magzamen/ Glantz 2001, Nakkash et al. 2018, Tsoukalas/ Glantz 2003                                   | Bhatta et al. 2020a, Crosbie/ Schmidt 2020, Crosbie et al. 2016, Crosbie et al. 2017, Crosbie et al. 2018, Hoe et al. 2021, Lane/ Carter 2012, Patanavanich/ Glantz 2020 | Bero et al. 2001, Crosbie et al. 2016, Crosbie et al. 2017, Lane/ Carter 2012, Matthes et al. 2020, Nakkash et al. 2018,  | Bailey 2004                                                          | Bhatta et al. 2020a, Crosbie/ Schmidt 2020, Crosbie et al. 2016, Uang et al. 2018 |
| <b>Information Management</b>                           | Bhatta et al. 2020a, Bosma et al. 2021, Crosbie et al. 2011, Givel/ Glantz 2000, Goldman/ Glantz 1999, Lane/ Carter 2012, Magzamen/ Glantz 2001, Matthes et al. 2020, Sato 1999, Tsoukalas/ Glantz 2003, Uang et al. 2018 | Bhatta et al. 2020a, Crosbie et al. 2016, Lane/ Carter 2012,                                                                                                             | Bero et al. 2001, Crosbie et al. 2016, Hoe et al. 2021, Lane/ Carter 2012, Magzamen/ Glantz 2001,                         | Crosbie et al. 2017, Goldman/ Glantz 1999                            | Crosbie et al. 2016, Lane/ Carter 2012, Uang et al. 2018                          |
| <b>Coalition Management</b>                             | Bhatta et al. 2020a, Crosbie/ Schmidt 2020, Magzamen/ Glantz 2001, Lane/ Carter 2012, Nakkash et al. 2018, Patanavanich/ Glantz 2020, Tsoukalas/ Glantz 2003, Uang et al. 2018                                            | Bhatta et al. 2020a, Crosbie et al. 2016, Lane/ Carter 2012, Patanavanich/ Glantz 2020,                                                                                  | Bailey 2004, Crosbie et al. 2016, Magzamen/ Glantz 2001, Lane/ Carter 2012, Nakkash et al. 2018, O'Dougherty et al. 2010, | Crosbie et al. 2017                                                  | Bhatta et al. 2020a, Crosbie et al. 2016, Uang et al. 2018                        |
| <b>Reputation management</b>                            | Charoencna et al. 2012, Egbe et al. 2019, Kusi-Ampofo 2021                                                                                                                                                                | Charoencna et al. 2012, Kusi-Ampofo 2021                                                                                                                                 | Magzamen/ Glantz 2001                                                                                                     | Bhatta et al. 2020b, Bhatta et al. 2020c, Hiilamo 2003, Tumwine 2011 | Charoencna et al. 2012, Magzamen/ Glantz 2001                                     |
| <b>Litigation</b>                                       | Chantornvong/ McCargo 2003                                                                                                                                                                                                |                                                                                                                                                                          | Magzamen/ Glantz 2001                                                                                                     | Bhatta et al. 2020a                                                  | Chantornvong/ McCargo 2003, Crosbie/ Schmidt 2020, Magzamen/ Glantz 2001          |
| <b>Illicit trade</b>                                    |                                                                                                                                                                                                                           |                                                                                                                                                                          |                                                                                                                           |                                                                      |                                                                                   |
